P5443

**NOD2 knock down worsens diastolic dysfunction in murine angiotensin II-induced heart failure**

I. Mueller, J. Lin, K. Pappritz, C. Tschoepe, S. Van Linthout

*Berlin Institute of Health Center for Regenerative Therapies, Berlin, Germany*

**Background:** Heart failure with preserved ejection fraction (HFpEF) is associated with cardiac inflammatory responses, indicating a potential role of the immune system in the pathology of diastolic dysfunction. The cytoplasmic pattern recognition receptor, nucleotide binding oligomerization domain 2 (NOD2) belongs to the innate immune system and induces among others the NLRP3 inflammasome, known to be involved in myocarditis and coronary heart disease.

**Purpose:** The aim of this study was to explore the role of NOD2 in Angiotensin II (AngII)-induced diastolic heart failure.

**Methods:** In NOD2<sup>-/-</sup> knock down and C57Bl6/j-wild type (WT) mice, diastolic dysfunction was induced by subcutaneous administration of 1.4mg/kg\*day<sup>-1</sup> AngII. Twenty-one days after first AngII administration, left ventricular (LV) function was evaluated by pressure tip catheter. Cardiac fibrosis, inflammation, and the expression of NOD2 and the NLRP3 component Apoptosis-associated speck like protein containing a caspase recruitment domain (ASC) were determined via immunohistochemistry, real-time PCR or Western Blot.

**Results:** LV NOD2 mRNA expression was 2.3-fold ( $p < 0.0005$ ) and 1.9-fold ( $p < 0.0005$ ) lower in NOD2<sup>-/-</sup> control and NOD2<sup>-/-</sup> AngII mice compared to their respective WT littermates. In parallel, LV protein expression of the downstream NLRP3 component Apoptosis-associated speck

like protein containing a caspase recruitment domain (ASC) was 1.5-fold ( $p < 0.05$ ) lower in NOD2<sup>-/-</sup> AngII mice versus WT AngII mice, whereas LV protein IL-1 $\beta$  levels were unchanged. LV diastolic dysfunction was more pronounced in NOD2<sup>-/-</sup> AngII mice versus WT AngII mice, as displayed by a 19% ( $p < 0.05$ ) increased LV relaxation time and 24% ( $p < 0.057$ ) impaired dP/dtmin, with no changes in the ejection fraction (EF: NOD2<sup>-/-</sup> AngII 72.5% $\pm$ 5.4 versus WT AngII 65.6 $\pm$ 3.5). In parallel, LV presence of CD68-positive cells was 1.8-fold ( $p < 0.05$ ) higher in NOD2<sup>-/-</sup> AngII compared to WT AngII mice. Concomitantly, NOD2<sup>-/-</sup> AngII mice displayed 1.3-fold ( $p < 0.05$ ) and 1.7-fold ( $p < 0.05$ ) higher LV mRNA expression of the chemokine macrophage inflammatory protein (MIP)-2 and monocyte chemoattractant protein (MCP)-1 compared to WT AngII mice, respectively. Furthermore, cardiac interstitial fibrosis in NOD2<sup>-/-</sup> mice with AngII-induced diastolic dysperformance was more pronounced versus the WT AngII group, as indicated by a 2.0-fold ( $p < 0.0005$ ), 2.0-fold, and 1.6-fold ( $p < 0.05$ ) higher LV ColI/ColIII ratio, and TGF- $\beta$  and TIMP-1 mRNA expression, respectively.

**Conclusion:** NOD2<sup>-/-</sup> deteriorates LV diastolic dysfunction and worsens pathophysiological key mechanisms in mice with AngII-induced diastolic heart failure.
